# Supplementary material
Source: PubMed Central journal article supplement (PMC10939886)
Supplement: NIHMS1954400-supplement-1.pdf [file NIHMS1954400-supplement-1.pdf]

A

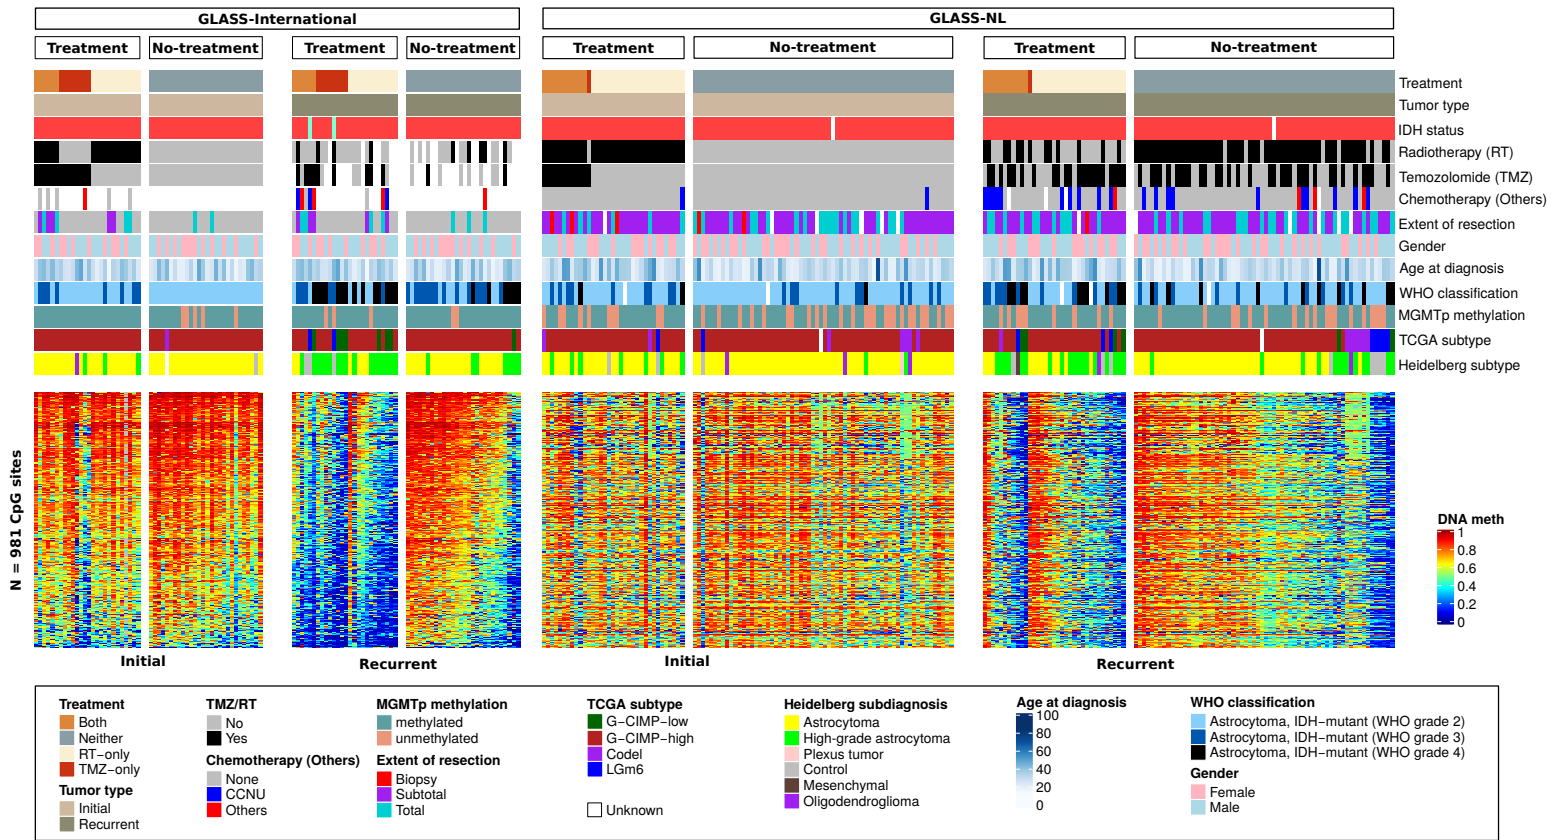

B

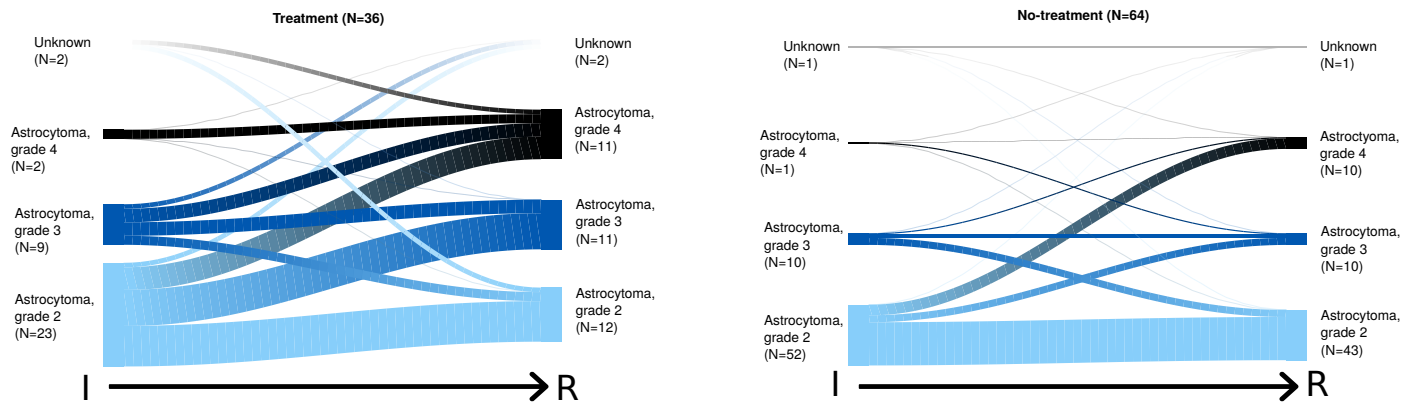

C

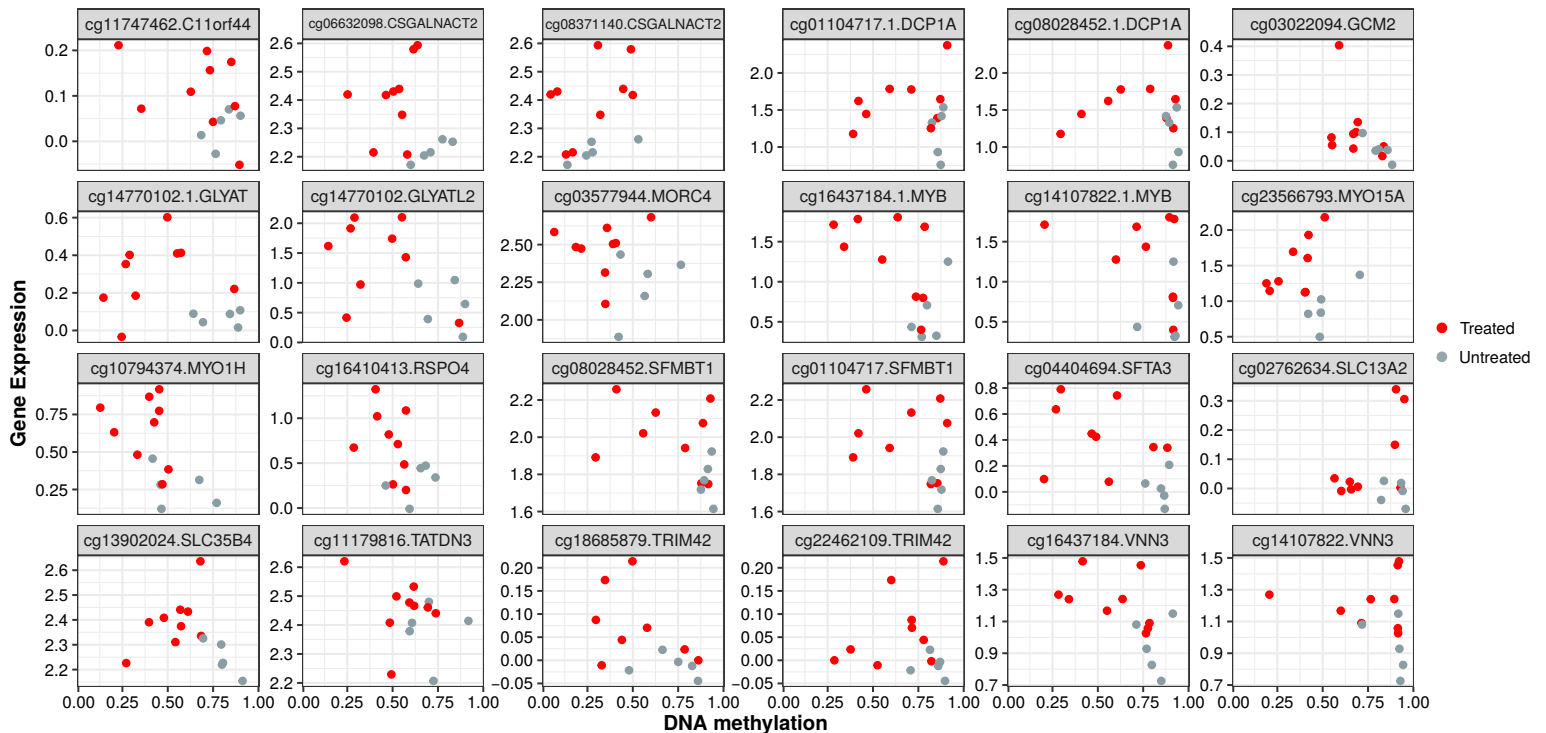

**Figure S2.** DNA methylation loss is associated with malignant progression of glioma after standard treatment in the validation cohort: GLASS-NL, related to Figure 3. A) Heatmap of DNA methylation data. Analysis using astrocytoma-only samples from GLASS-International cohort identified 981 CpG probes that are associated with treatment astrocytomas IDHmut paired glioma samples. Samples from the validation cohort are also shown. Samples are stratified by cohort, initial/recurrent status and treatment status. Column-wise represents glioma samples, row-wise represents CpG probes. DNA methylation beta-values range from 0 (low) to 1 (high). Additional tracks are included at the top of the heatmaps to identify each sample membership within separate cluster analysis. B) Evolution of tumor histology (2021 WHO classification) of the validation cohort (GLASS-NL) after treatment compared to non-treated gliomas. C) Scatter plot of 24 CpG-gene pairs epigenetically regulated genes after treatment in IDHmut gliomas.

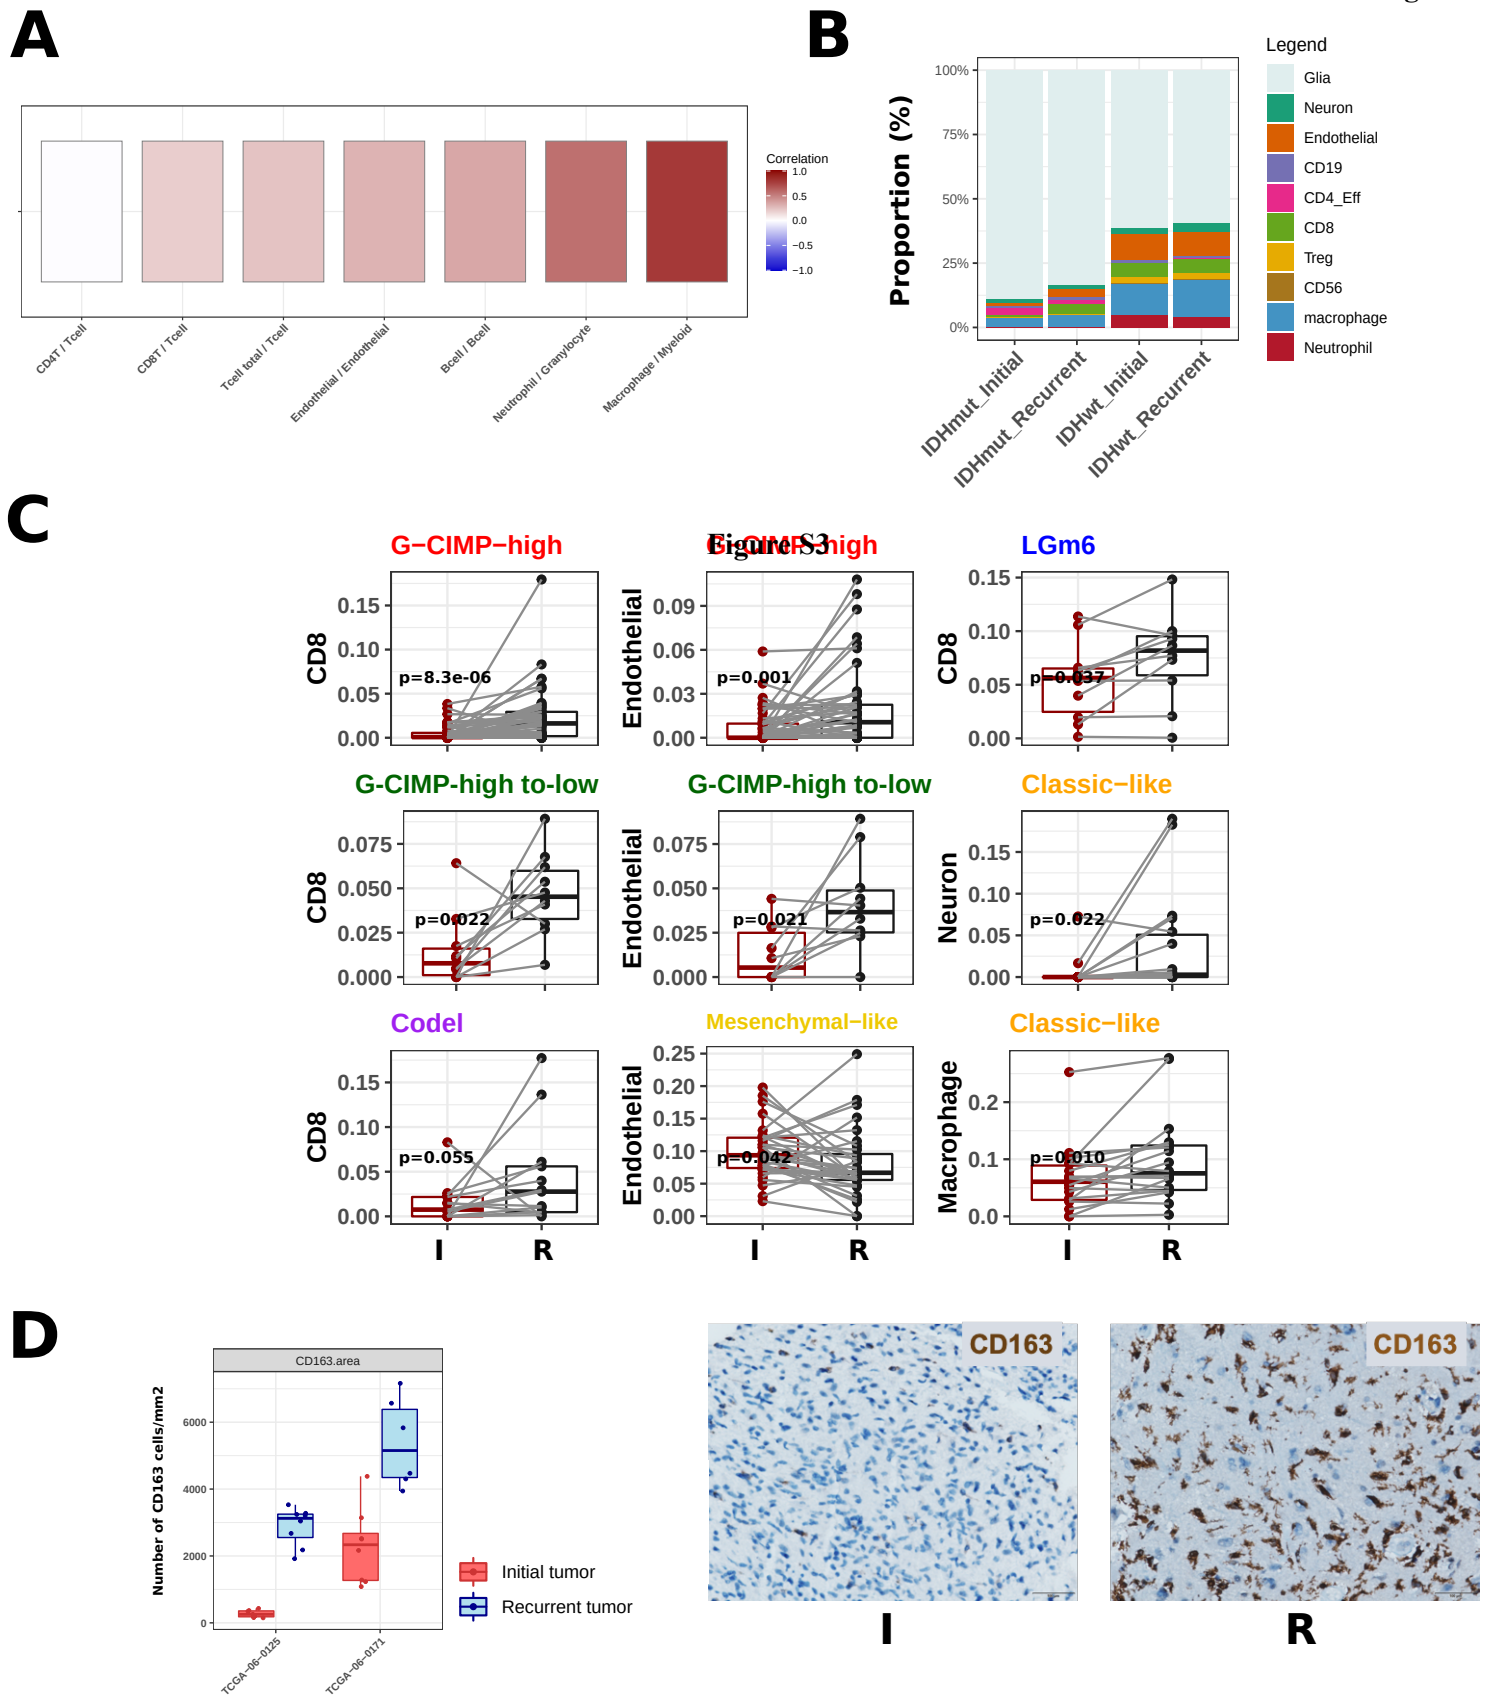

**Figure S3.** Glioma subtypes present different tumor microenvironments and it changes overtime, related to Figure 4. A) Correlation between cell composition estimated by DNA methylation and by gene expression. B) Barplots of the estimated median infiltration of specific cell types as a proportion of all cell types (range scaled from 0 to 100%) in 132 glioma tumors, divided by recurrent and IDH mutation status. C) Cell type proportion (range scaled from 0 to 100%) in samples originating from the matched initial and recurrent tumors, divided by molecular subtypes. All comparisons (initial vs. recurrence, by subtype, for the specified cell population) are statistically significant ( $P < 0.05$ ). p-values calculated using a paired Wilcoxon rank-sum test. Matched initial and recurrent tumors are linked by the lines. D) Representative immunohistochemical staining for CD163 marker protein in two individual patients with changing levels of tumor-infiltrating immune cells between initial and recurrent tumors.
